# Supplementary material
Source: Springer Nature journal article supplement (https://www.springermedizin.de/resource/supplementary/12885_2009_2018_MOESM5_ESM.pdf/9460322)

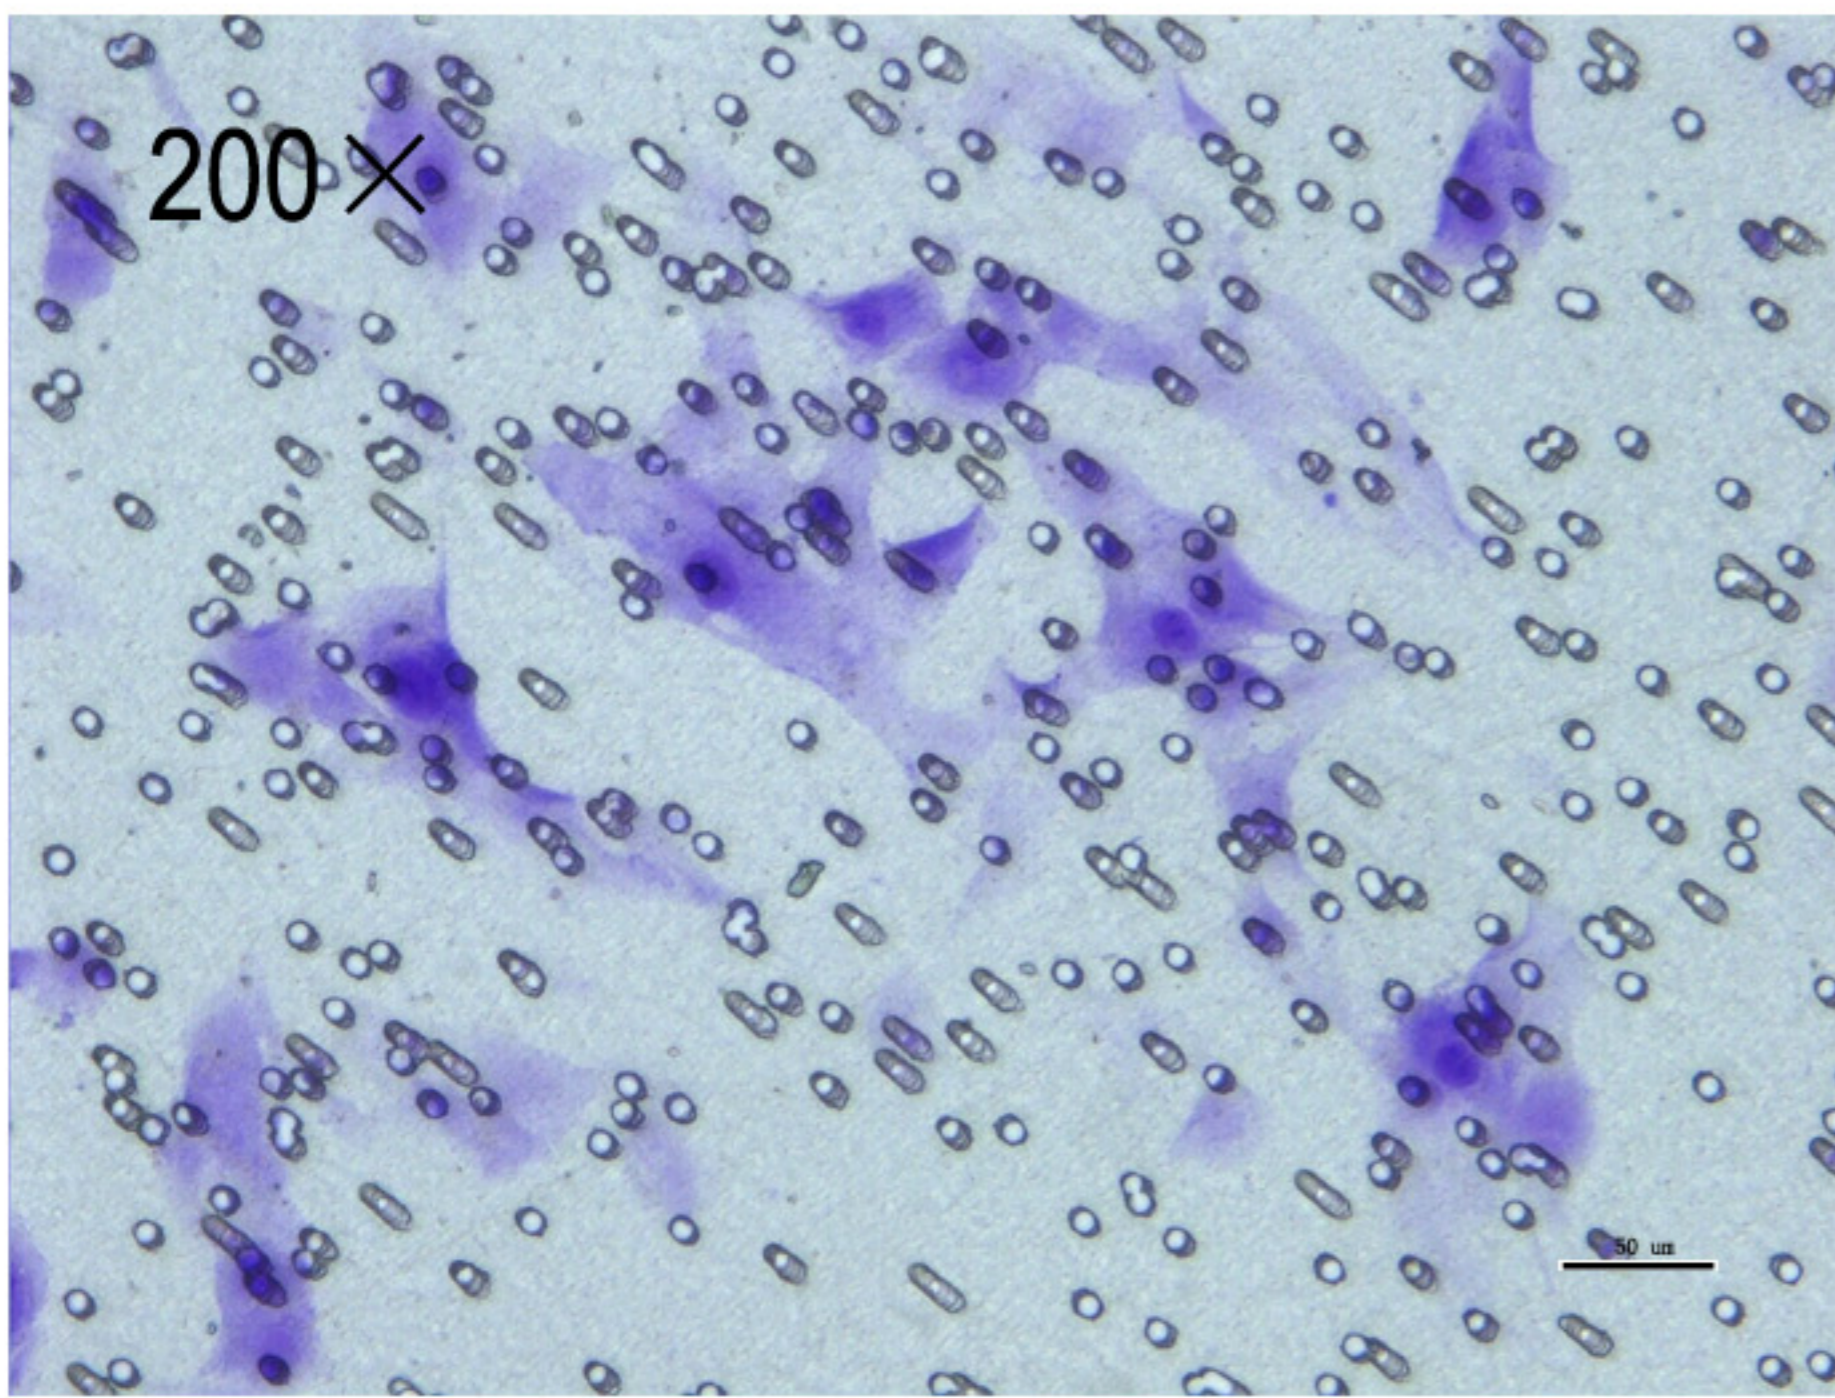

MHCC97L

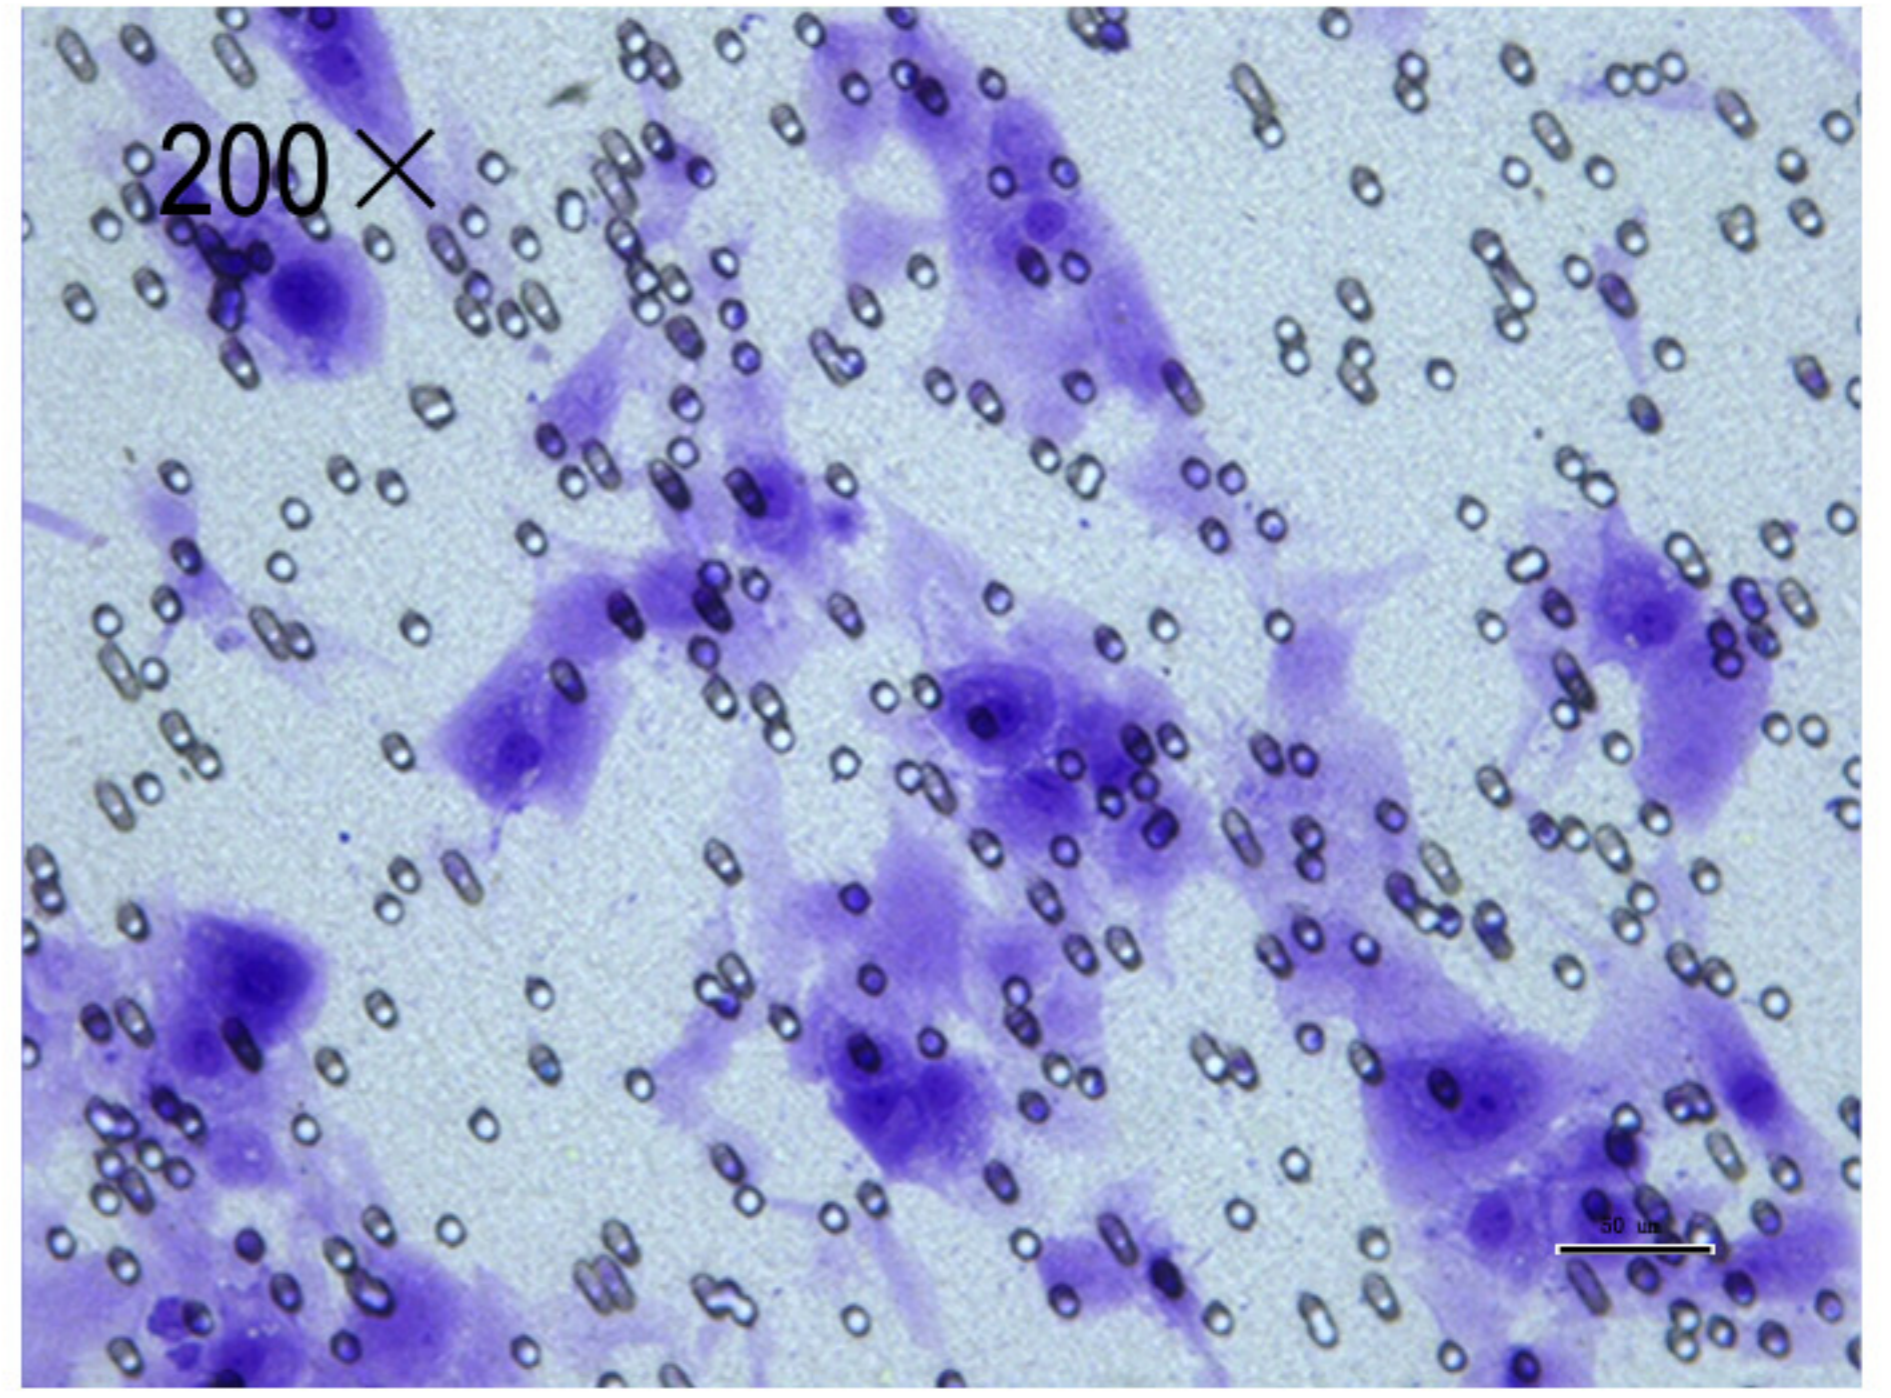

MHCC97L-Oxa

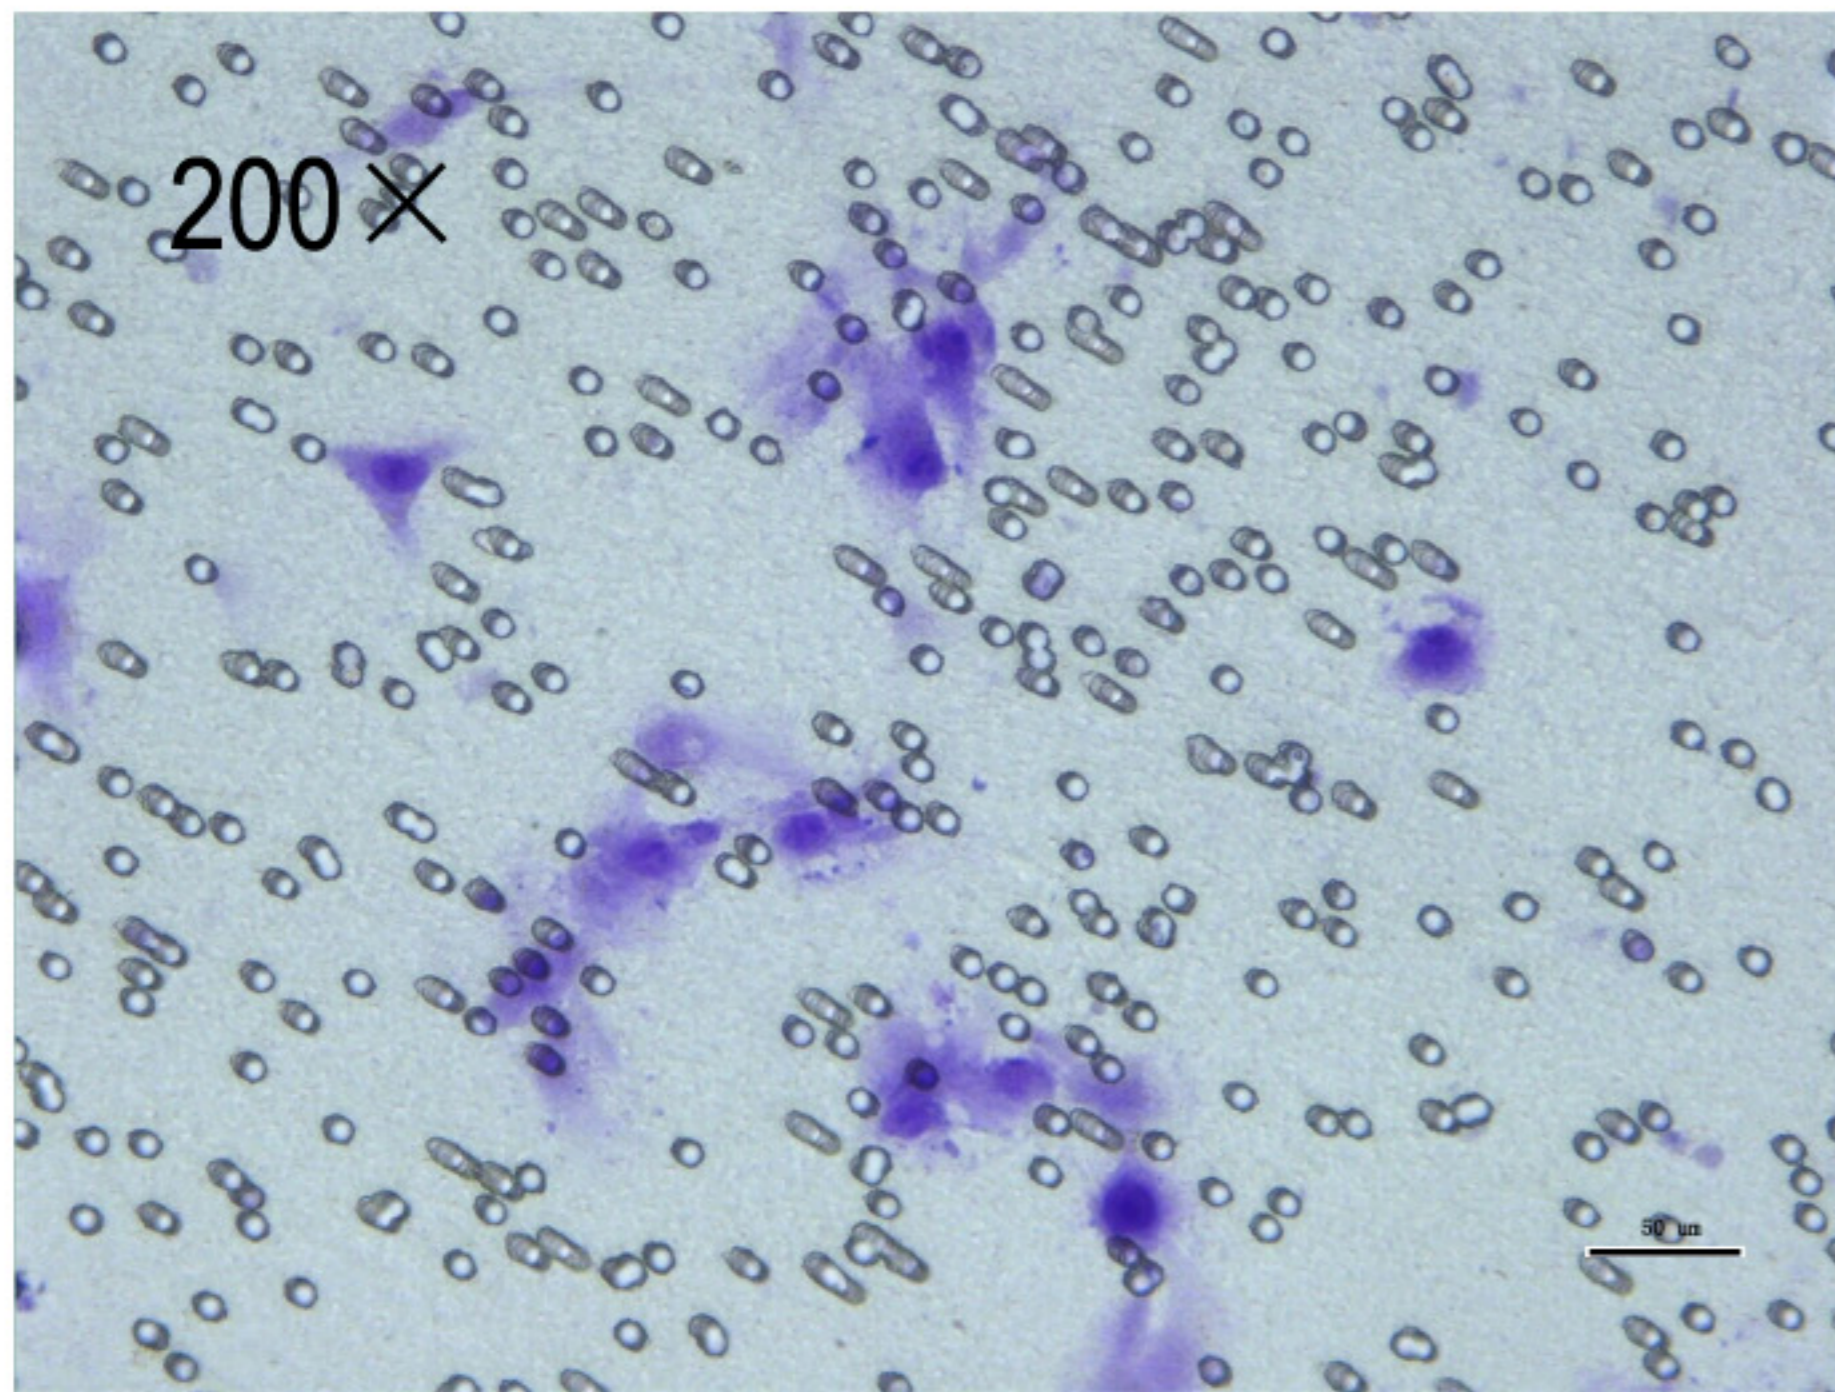

HepG2

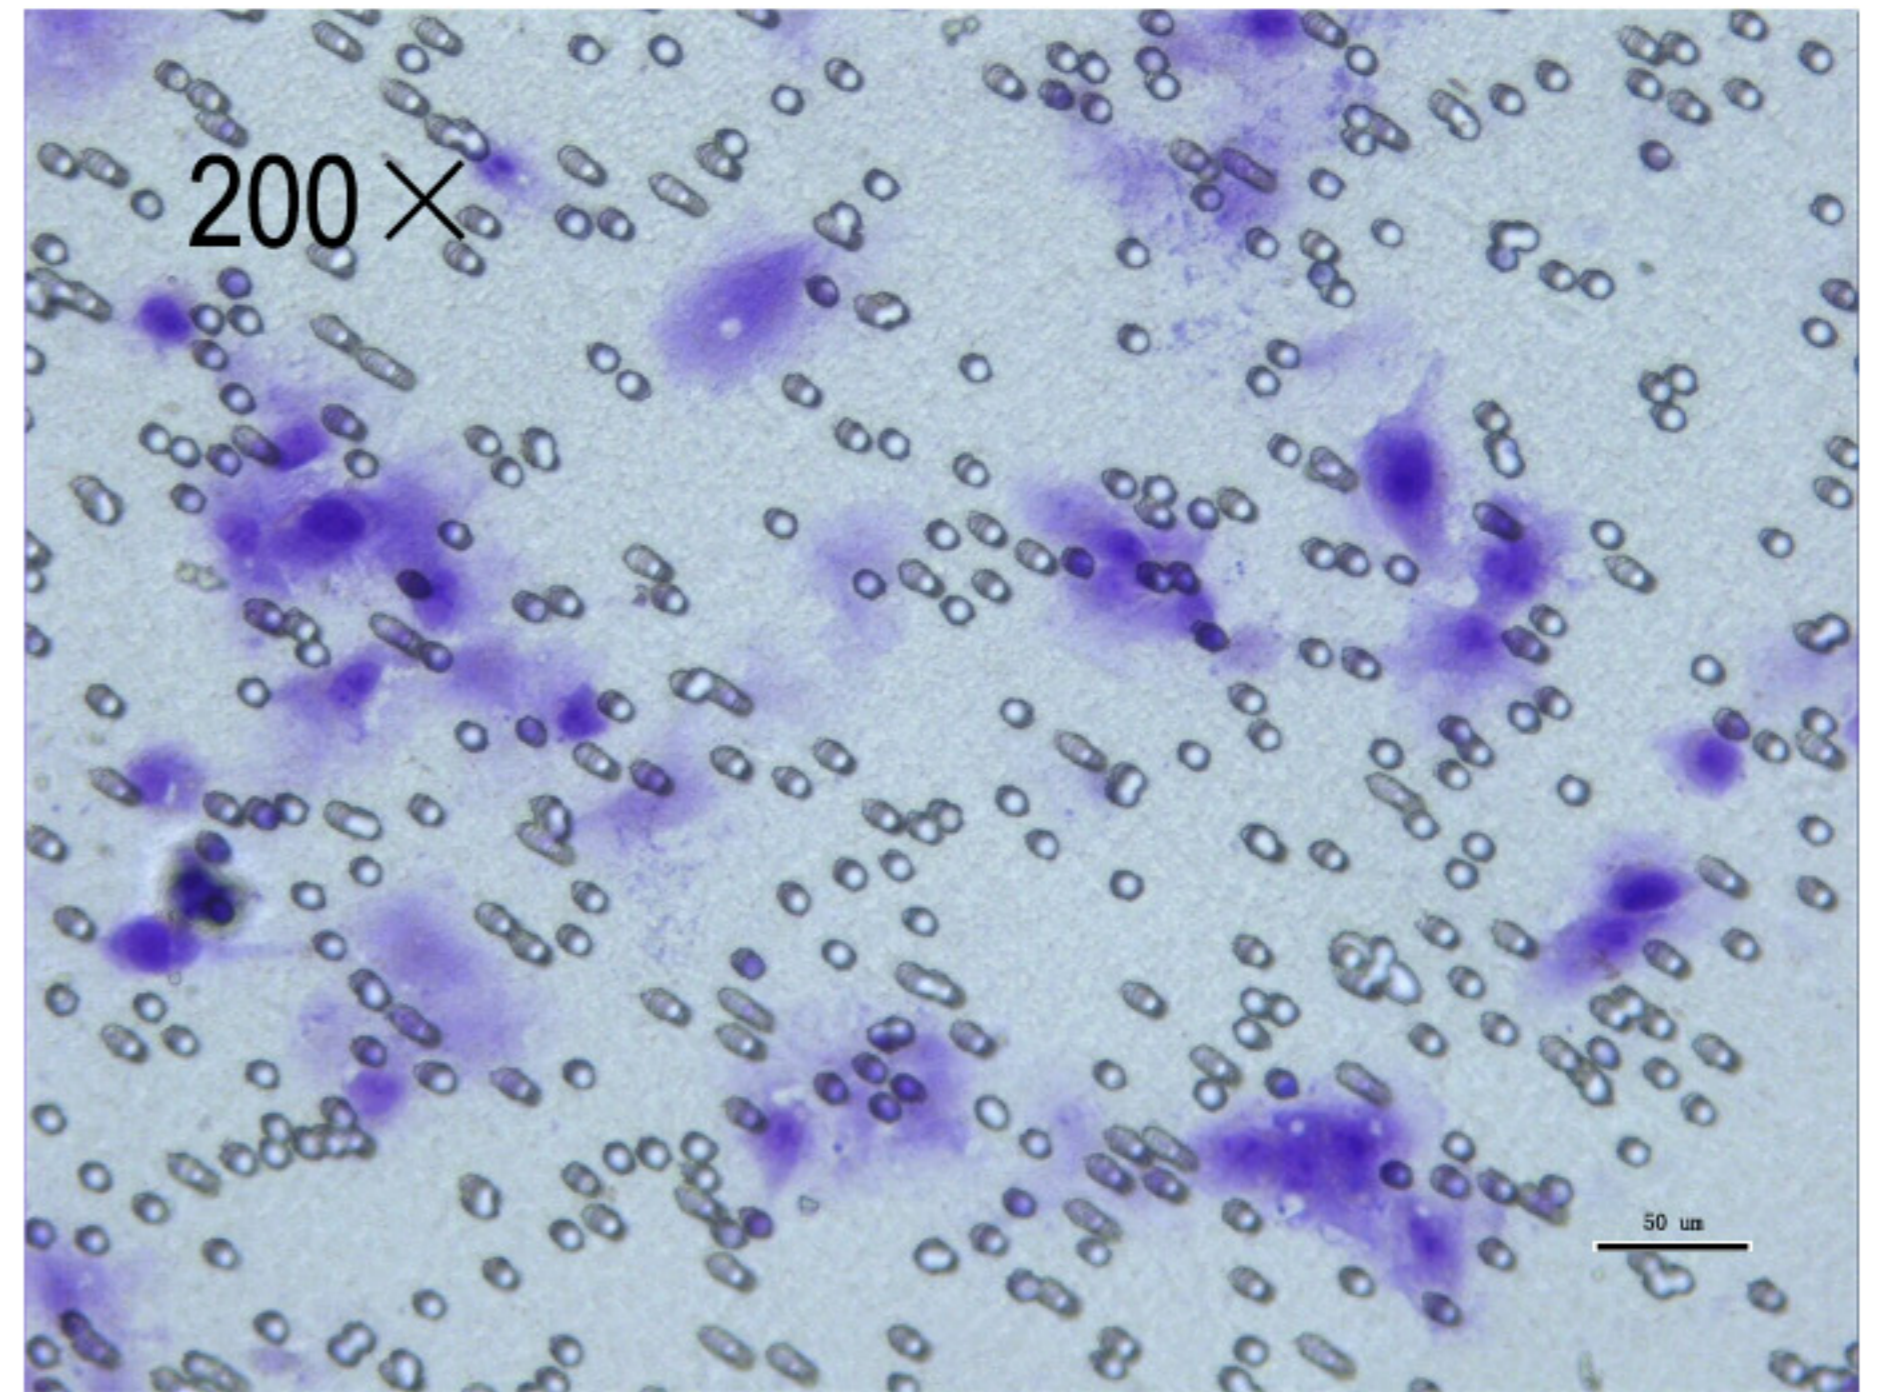

HepG2-Oxa

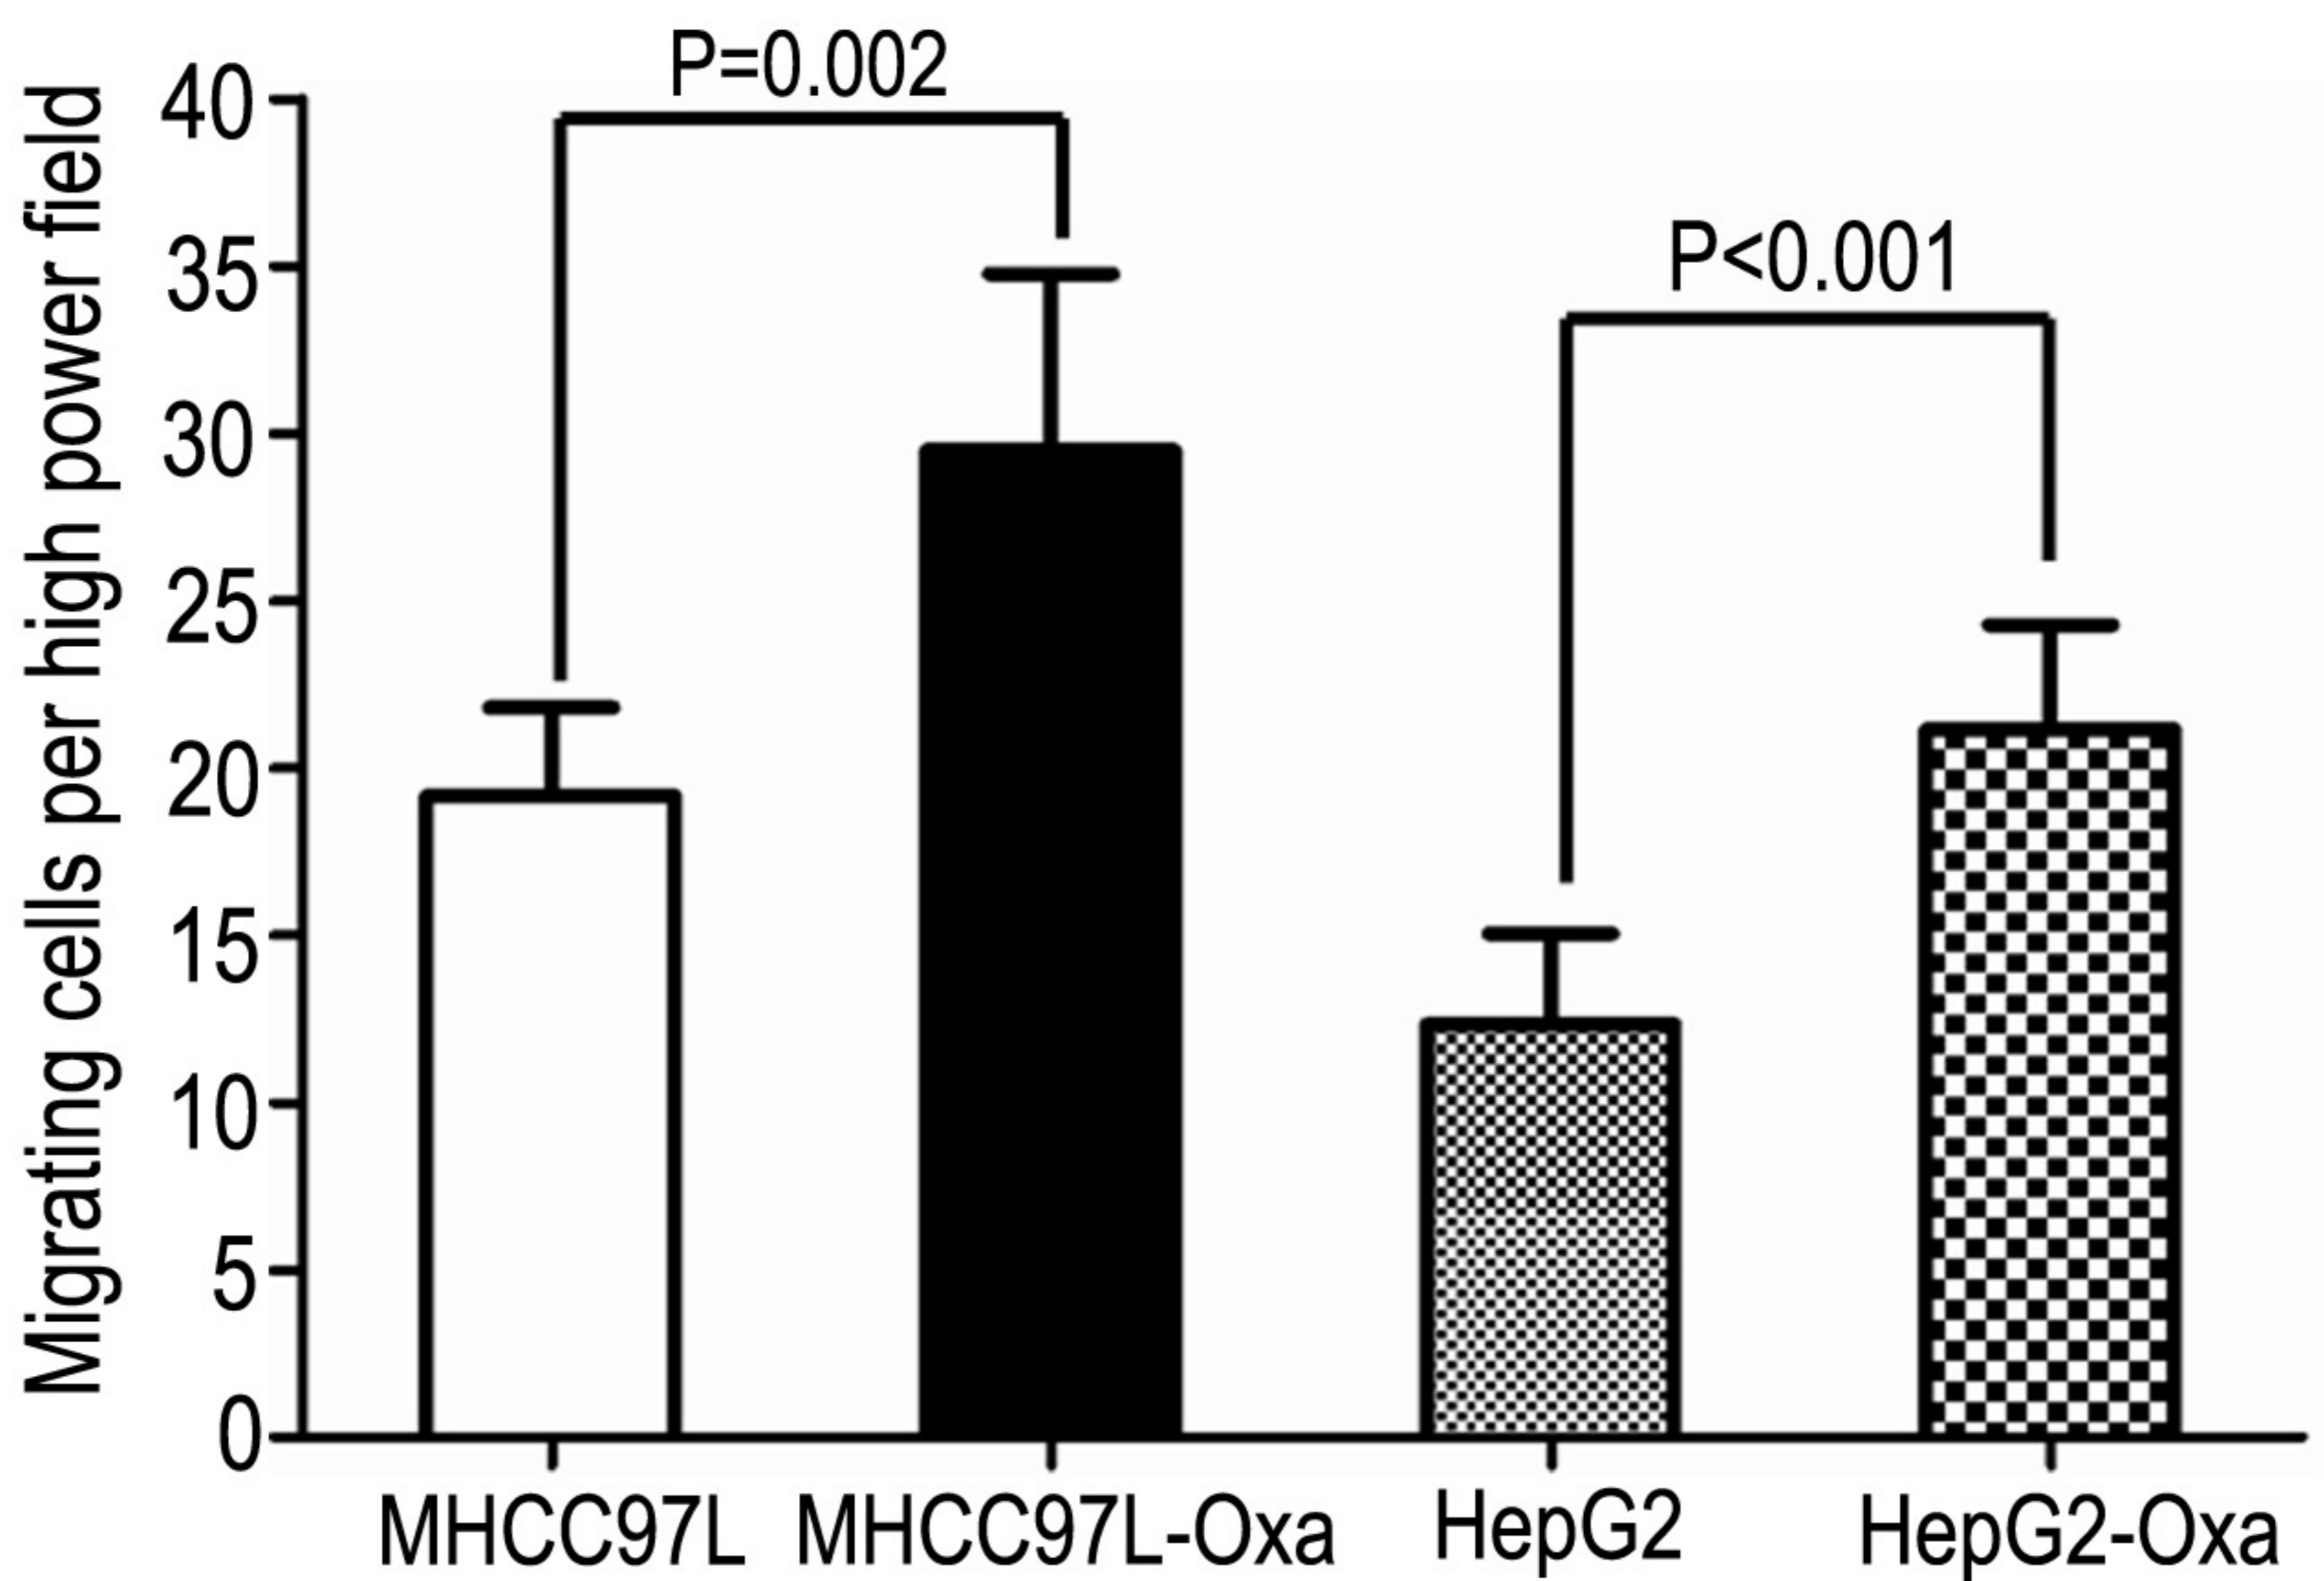

Supplement: MOESM5 [file 9460322]
